# Supplementary material for: Interpret with Caution: COPUS Instructional Styles May Not Differ in Terms of Practices That Support Student Learning
Source: Atypon-hosted journal article supplement (doi:10.1187/cbe.20-09-0218), 2021-04-22
Supplement: combinedsupmats.pdf [file combinedsupmats.pdf]

# **Supplemental Material**

*CBE—Life Sciences Education*

McConnell *et al.*

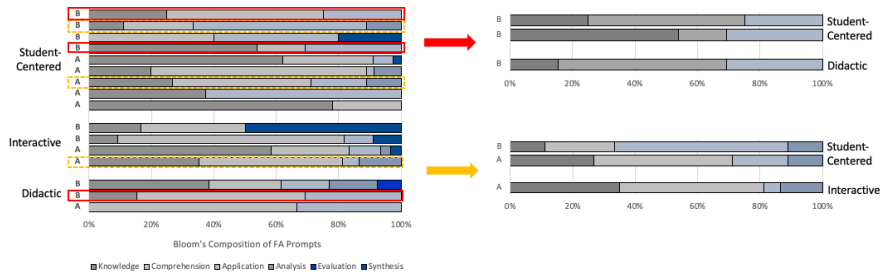

Supplementary Figure 1: Class sessions for which formative assessment prompts probed the first three Bloom's levels (red boxes, three class sessions) or the first four Bloom's levels (orange dashed boxes) appear to have similar frequency distributions (right panels).
